# Supplementary material for: Drastic steric effects from, respectively, a hydrogen, a methyl and an ethyl group on the coordination network of a zinc(II)–4,4′-bipyridine–carboxylato ternary system
Source: Royal Society of Chemistry journal article supplement (doi:10.1039/b901607d), 2009-01-01
Supplement: b901607d.pdf [file b901607d.pdf]

## Supporting Information

to the paper

### Drastic steric effects from respectively a hydrogen, a methyl and an ethyl group on the coordination network of a zinc(II)–4,4'-bipyridine–carboxylato ternary system

Pongthipun Phuengphai, Sujitra Youngme, Palangpon Kongsaree, Chaveng  
Pakawatchai, Narongsak Chaichit, Simon J. Teat, Patrick Gamez and Jan Reedijk

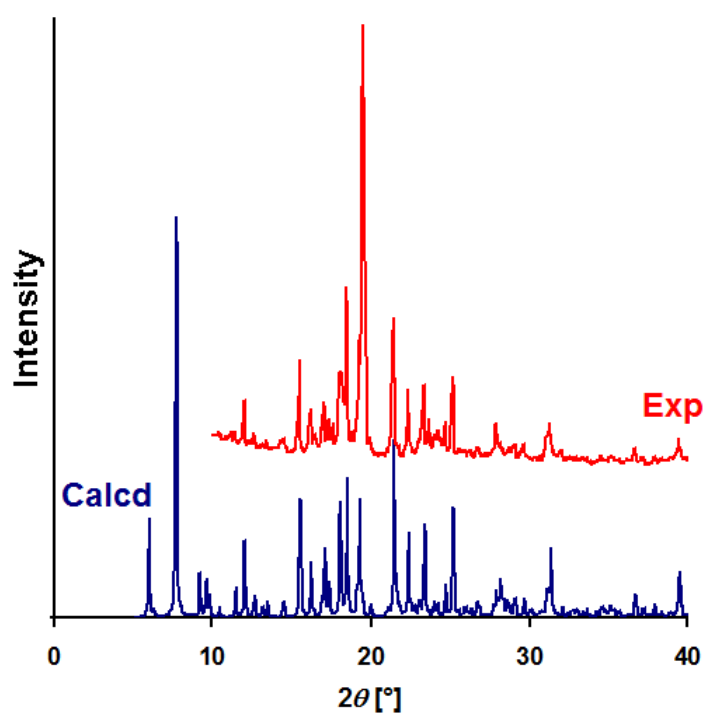

Figure S1. Calculated and experimental X-ray powder diffraction patterns of compound 1

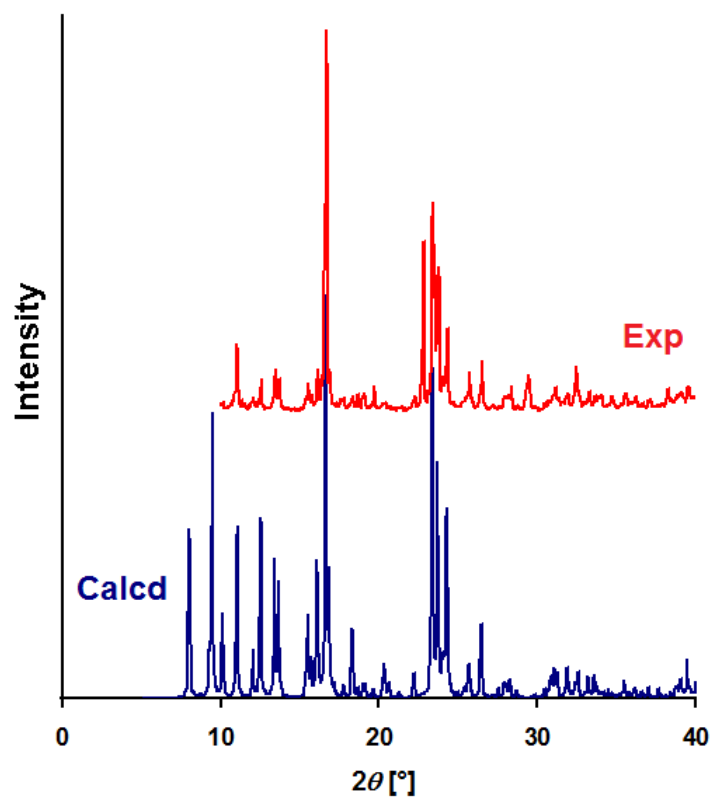

**Figure S2.** Calculated and experimental X-ray powder diffraction patterns of compound 2

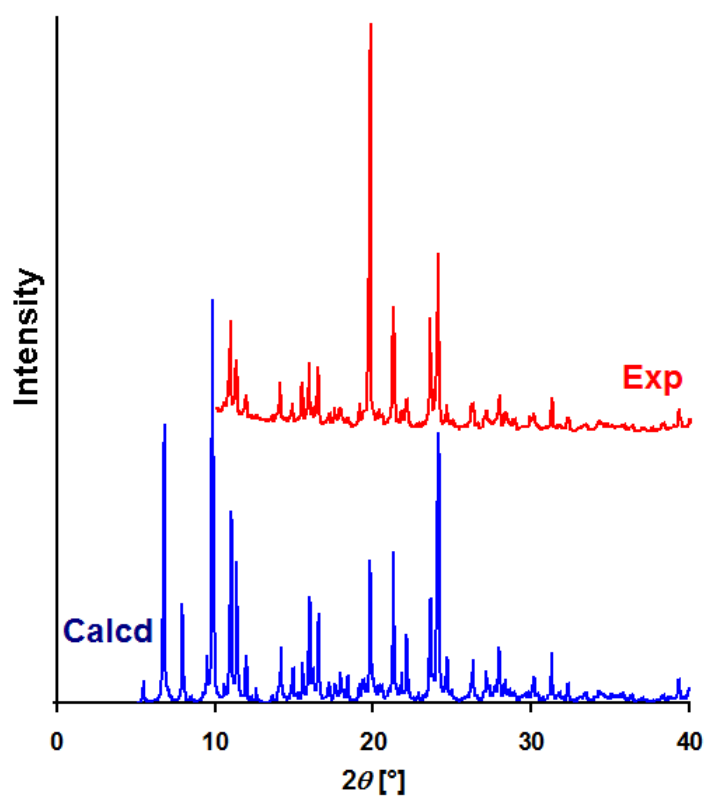

**Figure S3.** Calculated and experimental X-ray powder diffraction patterns of compound 3
